# Supplementary material for: Depletion of histone methyltransferase KMT9 inhibits lung cancer cell proliferation by inducing non-apoptotic cell death
Source: PubMed Central journal article supplement (PMC7027090; doi:10.1186/s12935-020-1141-2), 2020-02-17
Supplement: 12935_2020_1141_MOESM7_ESM.pdf [file 12935_2020_1141_MOESM7_ESM.pdf]

Eurofins Genomics Europe Applied Genomics GmbH, Anzinger Str. 7 a, D-85560 Ebersberg

Hannah Baumert  
 Uniklinik Freiburg, Zentrale Klinische Forschung  
 Breisacher Straße 66  
 79106 Freiburg  
 Germany

**Certificate  
 Cell Line Authentication Test  
 Order ID: 11106693202**

Report date: 21.01.2020

**Method:**

DNA isolation was carried out from cell pellet (cell layer).  
 Genetic characteristics were determined by PCR-single-locus-technology.  
 16 independent PCR-systems D8S1179, D21S11, D7S820, CSF1PO, D3S1358, TH01, D13S317, D16S539, D2S1338, AMEL, D5S818, FGA, D19S433, vWA, TPOX and D18S51 were investigated.  
 (Thermo Fisher, AmpFISTR® Identifier® Plus PCR Amplification Kit)  
 In parallel, positive and negative controls were carried out yielding correct results.

**Result:**

|                           |            |
|---------------------------|------------|
| <b>Client Sample Name</b> | 9          |
| <b>Sample Code</b>        | CL00000355 |
| D8S1179                   | 13,14      |
| D21S11                    | 30,2,31    |
| D7S820                    | 9,12       |
| CSF1PO                    | 11,13      |
| D3S1358                   | 14,15      |
| TH01                      | 8,9,3      |
| D13S317                   | 11,13      |
| D16S539                   | 10,13      |
| D2S1338                   | 19,25      |
| D19S433                   | 10,13      |
| vWA                       | 16,19      |
| TPOX                      | 8,9        |
| D18S51                    | 17,17      |
| AMEL                      | X,X        |
| D5S818                    | 12,13      |
| FGA                       | 25,26      |
| <b>Database Name</b>      | IMR-90     |

The table shows the result of the cell line analysis and the comparison with the online database of the DSMZ (<http://www.dsmz.de/de/service/services-human-and-animal-cell>) and the Cellosaurus database (<https://web.expasy.org/cellosaurus>). Please note that only the PCR-systems according to ANSI/ATCC standard ASN-0002 were aligned (D5S818, D13S317, D7S820, D16S539, VWA, TH01, TPOX, CSF1PO, AMEL).

**This report was created automatically and is therefore valid without a signature.**

The laboratory is accredited acc. to **DIN EN ISO/IEC 17025:2005**. The accreditation applies only to the test methods specified in the accreditation certificate. All analyses have been carried out with greatest care and on the basis of state of the art scientific knowledge. The results refer solely to the analysed samples. The duplication and publication also in parts requires a written authorization by this laboratory. Our General Terms and Conditions apply exclusively and are available under [eurofinsgenomics.com](http://eurofinsgenomics.com)

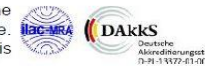

**Eurofins Genomics Europe  
 Applied Genomics GmbH**  
 Anzinger Straße 7 a  
 85560 Ebersberg  
 Germany

Tel.: +49 8092 8289-200  
 Fax: +49 8092 8289-201  
 Email: [info-eu@eurofins.com](mailto:info-eu@eurofins.com)  
 Web: [eurofinsgenomics.com](http://eurofinsgenomics.com)

Managing Directors: Dr. Michael Hadem,  
 Dr. Peter Persigehl  
 Register Court Munich HRB 207710  
 VAT ID: DE815473648

HypoVereinsbank  
 IBAN: DE23 2073 0017 7000 0006 50  
 SWIFT: HYVEDEMM17
